# Supplementary material for: Genetic factors affecting EBV copy number in lymphoblastoid cell lines derived from the 1000 Genome Project samples
Source: PLoS One. 2017 Jun 27;12(6):e0179446. doi: 10.1371/journal.pone.0179446 (PMC5487016; doi:10.1371/journal.pone.0179446)
Supplement: S2 Table — (XLSX) [file pone.0179446.s004.xlsx]

## Sheet: S2 Table
Pop	ASW	BEB	CDX	CEU	CHB	CHS	CLM	ESN	FIN	GBR	GIH	GWD	IBS	JPT	LWK	MSL	MXL	TSI
ASW
BEB	0.02913
CDX	2.2e-06	1
CEU	1e-09	0.1062	1
CHB	1	0.00082	1.5e-09	3.2e-14
CHS	1	5.2e-10	2e-16	2e-16	1
CLM	1	0.19112	8.4e-06	1.6e-09	1	0.02169
ESN	1	0.53989	5.1e-05	1.7e-08	1	0.00804	1
FIN	1	1	0.01609	2.5e-05	0.5742	8.5e-06	1	1
GBR	1	0.00019	3.2e-10	7.3e-15	1	1	1	1	0.17085
GIH	0.00224	1	1	0.40114	1.6e-05	8.9e-13	0.01371	0.05152	1	3.4e-06
GWD	0.00149	1	1	0.48194	8.5e-06	3.2e-13	0.00888	0.03498	1	1.8e-06	1
IBS	2e-16	3.9e-09	0.00086	0.15665	2e-16	2e-16	2e-16	2e-16	9.8e-16	2e-16	1.7e-08	2.1e-08
JPT	1	1	0.00021	7.5e-08	1	0.0007	1	1	1	1	0.16837	0.11707	2e-16
LWK	1	0.01895	2.3e-07	1.8e-11	1	0.22669	1	1	1	1	0.00081	0.00048	2e-16	1
MSL	0.37889	1	1	0.01387	0.03415	2.4e-07	1	1	1	0.00927	1	1	2.6e-10	1	0.37999
MXL	0.4111	2e-10	2e-16	2e-16	0.21153	1	0.00306	0.00115	1.7e-06	1	8.1e-13	3.4e-13	2e-16	0.00011	0.03212	5.2e-08
TSI	0.00752	1	1	0.12679	8.7e-05	9.1e-12	0.04825	0.16309	1	1.9e-05	1	1	1.7e-09	0.50225	0.0034	1	6.5e-12
YRI	1	0.06878	1.2e-06	1.2e-10	1	0.03625	1	1	1	1	0.00356	0.00219	2e-16	1	1	1	0.00508	0.01411
